# Supplementary material for: Correlation between Structural and Functional Changes in Patients with Raised Intraocular Pressure Due to Graves’ Orbitopathy
Source: MDPI journal article supplement (doi:10.3390/diagnostics14060649), 2024-03-20
Supplement: s1 [file s1]

**Supplementary Materials:**

**Table S1** *Post-hoc* analysis of differences in the examined clinical parameters: Mann-Whitney U test. GO - Graves' orbitopathy, GO IOP - Graves' orbitopathy with elevated intraocular pressure, POAG- primary open-angle glaucoma; IOP- intraocular pressure; CCT- central corneal thickness; BCVA - best corrected visual acuity

| Post-hoc comparisons  | P value  |        |         |
|-----------------------|----------|--------|---------|
|                       | GO vs GO | GO vs  | GO IOP  |
|                       | IOP      | POAG   | vs POAG |
| IOP (mmHg)            | <0.001   | <0.001 | 0.001   |
| CCT (μm)              | 0.018    | <0.001 | 0.086   |
| Exophthalmometry (mm) | 0.002    | <0.001 | <0.001  |
| BCVA                  | 0.007    | <0.001 | 0.005   |

**Table S2:** Differences in the classification of disease severity between investigated groups (EUGOGO Severity Classification); GO - Graves' orbitopathy, GO IOP - Graves' orbitopathy with elevated intraocular pressure.

|                  |          | Group |       |        |       | P      |
|------------------|----------|-------|-------|--------|-------|--------|
|                  |          | GO    |       | GO IOP |       |        |
|                  |          | N     | %     | N      | %     |        |
| Disease severity | Mild     | 83    | 88.3% | 62     | 63.9% | <0.001 |
|                  | Moderate | 11    | 11.7% | 35     | 36.1% |        |

**Table S3:** Duration of thyroid disease and orbitopathy: Kruskal-Wallis test; GO - Graves' orbitopathy, GO IOP - Graves' orbitopathy with elevated intraocular pressure, POAG- primary open-angle glaucoma.

| Group                             |        | N  | Min  | Max   | Centile |        |       | P     |
|-----------------------------------|--------|----|------|-------|---------|--------|-------|-------|
|                                   |        |    |      |       | 25.     | Median | 75.   |       |
| Duration of thyroid disease (yrs) | GO     | 48 | 0.50 | 38.00 | 2.00    | 4.00   | 10.00 | 0.431 |
|                                   | GO IOP | 50 | 0.50 | 30.00 | 2.88    | 5.00   | 13.00 |       |
| Duration of orbitopathy (yrs)     | GO     | 48 | 0.50 | 13.00 | 1.00    | 2.00   | 3.00  | 0.435 |
|                                   | GO IOP | 50 | 0.00 | 19.00 | 1.00    | 2.00   | 4.00  |       |

**Table S4.** *Post-hoc* testing for differences in clinical changes with respect to optic nerve parameters: Mann-Whitney U test. GO - Graves' orbitopathy, GO IOP - Graves' orbitopathy with elevated intraocular pressure, POAG- primary open-angle, RNFL- retinal nerve fibre layer, c/d - cup/disc

| Post-hoc comparisons         | P value  |        |           |
|------------------------------|----------|--------|-----------|
|                              | GO vs GO | GO vs  | GO IOP vs |
|                              | IOP      | POAG   | POAG      |
| RNFL ( $\mu\text{m}$ )       | 0.907    | <0.001 | <0.001    |
| Rim area ( $\text{mm}^2$ )   | 0.001    | <0.001 | <0.001    |
| Disc area ( $\text{mm}^2$ )  | 0.145    | 0.218  | 0.989     |
| Average c/d ratio            | <0.001   | <0.001 | <0.001    |
| Vertical c/d ratio           | <0.001   | <0.001 | <0.001    |
| Cup volume ( $\text{mm}^3$ ) | 0.007    | <0.001 | <0.001    |

**Table S5:** Differences in selected risk factors presented through categorical variables between participants in the GO and GO IOP groups. GO - Graves' orbitopathy, GO IOP - Graves' orbitopathy with elevated intraocular pressure, COPD - chronic obstructive pulmonary disease.

|                                                    |     | Group |       |        |       | P     |
|----------------------------------------------------|-----|-------|-------|--------|-------|-------|
|                                                    |     | GO    |       | GO IOP |       |       |
|                                                    |     | N     | %     | N      | %     |       |
| Smoking                                            | Yes | 27    | 56.3% | 27     | 54.0% | 0.823 |
|                                                    | No  | 21    | 43.8% | 23     | 46.0% |       |
| Stress at the time of diagnosis of thyroid disease | Yes | 26    | 54.2% | 15     | 30.0% | 0.015 |
|                                                    | No  | 22    | 45.8% | 35     | 70.0% |       |
| Diabetes                                           | Yes | 5     | 10.4% | 4      | 8.0%  | 0.679 |
|                                                    | No  | 43    | 89.6% | 46     | 92.0% |       |
| Arterial hypertension                              | Yes | 11    | 22.9% | 15     | 30.0% | 0.427 |
|                                                    | No  | 37    | 77.1% | 35     | 70.0% |       |
| Hyperlipidemia                                     | Yes | 10    | 20.8% | 6      | 12.0% | 0.237 |
|                                                    | No  | 38    | 79.2% | 44     | 88.0% |       |
| Depression                                         | Yes | 4     | 8.3%  | 4      | 8.0%  | 0.952 |
|                                                    | No  | 44    | 91.7% | 46     | 92.0% |       |
| Asthma/ Chronic obstructive pulmonary disease      | Yes | 4     | 8.3%  | 1      | 2.0%  | 0.154 |
|                                                    | No  | 44    | 91.7% | 49     | 98.0% |       |

**Table S6:** Differences in family history between participants in the GO and GO IOP groups.

|                   |                               | Group |       |        |       | P     |
|-------------------|-------------------------------|-------|-------|--------|-------|-------|
|                   |                               | GO    |       | GO IOP |       |       |
|                   |                               | N     | %     | N      | %     |       |
| Family<br>history | Negative                      | 27    | 56.3% | 28     | 56.0% | 0.706 |
|                   | Glaucoma                      | 2     | 4.2%  | 5      | 10.0% |       |
|                   | Thyroid disease               | 16    | 33.3% | 14     | 28.0% |       |
|                   | Glaucoma + thyroid<br>disease | 3     | 6.3%  | 3      | 6.0%  |       |
